# Supplementary material for: The natural history of classic galactosemia: lessons from the GalNet registry
Source: PubMed Central journal article supplement (PMC6486996; doi:10.1186/s13023-019-1047-z), 2019-04-27
Supplement: 13023_2019_1047_MOESM1_ESM.pdf [file 13023_2019_1047_MOESM1_ESM.pdf]

**Table S4**

**Table S4. International Standard Classification of Education (ISCED).** ISCED 0 Early childhood education; ISCED 1 Primary education; ISCED 2 Lower secondary education; ISCED 3 Upper secondary education; ISCED 4 Post-secondary non-tertiary education; ISCED 5 Short-cycle tertiary education; ISCED 6 Bachelor's or equivalent level; ISCED 7 Master's or equivalent level; ISCED 8 Doctoral or equivalent level.

|                          | <b>Patient *</b> |                |          | <b>Father</b> |                |          | <b>Mother</b> |          | <b>Non galactosemia sibling**</b> |                |          |
|--------------------------|------------------|----------------|----------|---------------|----------------|----------|---------------|----------|-----------------------------------|----------------|----------|
|                          | <b>n</b>         | <b>valid n</b> | <b>%</b> | <b>n</b>      | <b>valid n</b> | <b>%</b> | <b>n</b>      | <b>%</b> | <b>n</b>                          | <b>valid n</b> | <b>%</b> |
|                          |                  | 177            |          |               | 192            |          |               | 192      |                                   | 70             |          |
| <b>ISCED 0-3</b>         | 73               |                | 41.2     | 51            |                | 26.6     | 50            | 26.0     | 58                                |                | 82.9     |
| <b>ISCED 4-6</b>         | 75               |                | 42.4     | 59            |                | 30.7     | 83            | 43.2     | 12                                |                | 17.1     |
| <b>ISCED 6-9</b>         | 29               |                | 16.4     | 82            |                | 42.7     | 59            | 30.7     |                                   |                |          |
|                          |                  | 161            |          |               |                |          |               |          |                                   | 103            |          |
| <b>Regular education</b> | 119              |                | 73.9     |               |                |          |               |          | 100                               |                | 97.1     |
| <b>Special education</b> | 42               |                | 26.1     |               |                |          |               |          | 3                                 |                | 2.9      |

\* Included patients have all completed education.

\*\* 82.9% of the siblings are still in education.
