# Supplementary material for: The natural history of classic galactosemia: lessons from the GalNet registry
Source: PubMed Central journal article supplement (PMC6486996; doi:10.1186/s13023-019-1047-z), 2019-04-27
Supplement: 13023_2019_1047_MOESM2_ESM.pdf [file 13023_2019_1047_MOESM2_ESM.pdf]

**Table S5****Table S5. Social or occupational classification: Registrar General's Social Class (RGSC).**

|                                 | <b>Patient</b> |                |          | <b>Father</b> |                |          | <b>Mother</b> |                |          |
|---------------------------------|----------------|----------------|----------|---------------|----------------|----------|---------------|----------------|----------|
|                                 | <b>n</b>       | <b>valid n</b> | <b>%</b> | <b>n</b>      | <b>valid n</b> | <b>%</b> | <b>n</b>      | <b>valid n</b> | <b>%</b> |
|                                 |                | 149            |          |               | 200            |          |               | 209            |          |
| <b>Professional</b>             | 5              |                | 3.4      | 25            |                | 12.5     | 24            |                | 11.5     |
| <b>Managerial and technical</b> | 9              |                | 6.0      | 46            |                | 23.0     | 26            |                | 12.4     |
| <b>Skilled</b>                  | 33             |                | 22.1     | 76            |                | 38.0     | 78            |                | 37.3     |
| Manual                          | 10             |                | 30.3     | 45            |                | 59.2     | 14            |                | 17.9     |
| Non-Manual                      | 22             |                | 66.7     | 31            |                | 40.8     | 60            |                | 76.9     |
| <b>Partly skilled</b>           | 34             |                | 22.8     | 20            |                | 10.0     | 25            |                | 12.0     |
| <b>Unskilled</b>                | 68             |                | 45.6     | 33            |                | 16.5     | 56            |                | 26.8     |
