# Supplementary material for: The natural history of classic galactosemia: lessons from the GalNet registry
Source: PubMed Central journal article supplement (PMC6486996; doi:10.1186/s13023-019-1047-z), 2019-04-27
Supplement: 13023_2019_1047_MOESM3_ESM.pdf [file 13023_2019_1047_MOESM3_ESM.pdf]

## Table S1

**Table S1. Bone health.** BMD was measured by dual energy x-ray photometry (DXA) using T- or Z-scores of the lumbar spine, depending on age and gender. T-scores were used in post-menopausal women and men  $\geq$  50 years. Z-scores, considering age, gender, and ethnicity, were used in pre-menopausal women and men  $<$  50 years. A low BMD was classified as BMD T-score  $\leq$  -1.0 standard deviation (SD) or a BMD Z-score  $\leq$  -2.0 SD.

Median BMD Z-score in studied population was -0.8 SD, range -5.1 to 4.0 SD

Median BMD T-score in studied population was -1.1 SD, range -4.0 to 4.3 SD

|                                                                                   | <b>n</b> | <b>valid n</b> | <b>%</b> |
|-----------------------------------------------------------------------------------|----------|----------------|----------|
| <b>Low BMD<sup>1</sup></b>                                                        | 76       | 287            | 26.5     |
| <b>Fractures<sup>2</sup></b>                                                      | 21       | 213            | 9.9      |
| <b>Vitamin D level</b>                                                            |          | 200            |          |
| <b>Normal (&gt; 75 nmol/l)</b>                                                    | 77       |                | 38.5     |
| <b>Insufficiency (50-75 nmol/l)</b>                                               | 70       |                | 35.0     |
| <b>Deficiency (0-49 nmol/l)</b>                                                   | 53       |                | 26.5     |
| <b>Vitamin D deficiency + calcium supplement</b>                                  | 35       | 46             | 76.1     |
| <b>Vitamin D deficiency + vitamin D supplement</b>                                | 38       | 47             | 80.9     |
| <b>Calcium supplement</b>                                                         | 281      | 412            | 68.2     |
| <b>Vitamin D supplement</b>                                                       | 288      | 405            | 71.1     |
| <b>Adequate physical activity</b><br>according to WHO recommendation <sup>3</sup> | 140      | 186            | 75.3     |

<sup>1</sup> 64.9 % was female.

<sup>2</sup> Median age of patients who reported fractures was 24 years, range 6 to 59 years. A low BMD was present in 23.8% (5/21) of the patients with fractures, 61.1% of patients with a fracture was male.

<sup>3</sup> The World Health Organization (WHO) recommends 60 minutes of moderate- to vigorous-intensity physical activity per day for children and 150 minutes per week for adults.
