# Supplementary material for: The natural history of classic galactosemia: lessons from the GalNet registry
Source: PubMed Central journal article supplement (PMC6486996; doi:10.1186/s13023-019-1047-z), 2019-04-27
Supplement: 13023_2019_1047_MOESM4_ESM.pdf [file 13023_2019_1047_MOESM4_ESM.pdf]

## Table S2

Table S2. Growth and cataracts.

|                                         | n  | valid n | %    |
|-----------------------------------------|----|---------|------|
| <b>Short stature</b> (outside TH range) | 38 | 374     | 10.2 |
| <b>Cataract in the neonatal period</b>  | 68 | 264     | 25.8 |
| <b>Persistent cataract in childhood</b> | 20 | 44      | 45.5 |
| <b>Persistent cataract in adulthood</b> | 5  | 20      | 25.0 |
| <b>Cataract reported in childhood</b>   | 22 | 238     | 9.2  |
| <b>Cataract reported in adulthood*</b>  | 10 | 89      | 11.2 |

\* Median 29.5 years, range 18 to 41 years
