# Supplementary material for: The natural history of classic galactosemia: lessons from the GalNet registry
Source: PubMed Central journal article supplement (PMC6486996; doi:10.1186/s13023-019-1047-z), 2019-04-27
Supplement: 13023_2019_1047_MOESM5_ESM.pdf [file 13023_2019_1047_MOESM5_ESM.pdf]

**Table S3****Table S3. Dietary treatment.**

|                                             | <b>n</b> | <b>valid n</b> | <b>%</b> |
|---------------------------------------------|----------|----------------|----------|
| <b>Infant formula</b>                       |          | 394            |          |
| Soy                                         | 302      |                | 76.6     |
| Elemental formula                           | 50       |                | 12.7     |
| Other formula or combination                | 42       |                | 10.7     |
| <b>Age onset diet</b>                       |          | 392            |          |
| day 0-1*                                    | 65       |                | 16.6     |
| day 2-7                                     | 133      |                | 33.9     |
| day 8-14                                    | 134      |                | 34.2     |
| day 15-28                                   | 37       |                | 9.4      |
| >28 days                                    | 23       |                | 5.9      |
| <b>Lactose free diet</b>                    | 406      | 431            | 94.2     |
| <b>Not on lactose free diet</b>             | 25       | 431            | 5.8      |
| <b>Restrict galactosides</b>                | 109      | 416            | 26.2     |
| <b>Restrict fruit and vegetables</b>        | 95       | 429            | 22.1     |
| <b>Restrict nucleoproteins</b>              | 113      | 412            | 27.4     |
| <b>Cheese allowed</b> (mature, old cheeses) | 275      | 384            | 71.6     |
| <b>Strict diet</b> <sup>1</sup>             | 136      | 381            | 35.7     |
| <b>Relaxed diet</b> <sup>2</sup>            | 245      | 381            | 64.3     |

\* We have no information on siblings' relations.

<sup>1</sup> A strict diet was defined as lactose free and restriction of non-dairy sources (at least one of the following: galactosides, fruit and vegetables and/or nucleoproteins), with an estimated intake of galactose < 20 mg/day.

<sup>2</sup> A relaxed diet was defined as lactose free without further restrictions, with an estimated galactose intake <100 mg/day.
