# Supplementary material for: The natural history of classic galactosemia: lessons from the GalNet registry
Source: PubMed Central journal article supplement (PMC6486996; doi:10.1186/s13023-019-1047-z), 2019-04-27
Supplement: 13023_2019_1047_MOESM6_ESM.pdf [file 13023_2019_1047_MOESM6_ESM.pdf]

**Table S6****Table S6. Participating countries and respective center(s).**

| <b>Country and respective center(s)</b>                                                                                                        | <b>N. of patients</b> |
|------------------------------------------------------------------------------------------------------------------------------------------------|-----------------------|
| <b>Austria</b>                                                                                                                                 |                       |
| Medizinische Universität Wien Vienna                                                                                                           | 12                    |
| Medical University Innsbruck                                                                                                                   | 7                     |
| University Children's Hospital, Paracelsus Medical University, Salzburg                                                                        | 3                     |
| <b>Belgium</b>                                                                                                                                 |                       |
| University Hospital Antwerpen                                                                                                                  | 5                     |
| University Hospital Leuven                                                                                                                     | 5                     |
| <b>Croatia</b>                                                                                                                                 |                       |
| Klinički bolnički centar Zagreb                                                                                                                | 7                     |
| <b>Estonia</b>                                                                                                                                 |                       |
| Tartu University Hospital                                                                                                                      | 8                     |
| <b>France</b>                                                                                                                                  |                       |
| Hôpital Antoine Bécclère, Clamart                                                                                                              | 27                    |
| <b>Germany</b>                                                                                                                                 |                       |
| Uniklinik RWTH Aachen                                                                                                                          | 27                    |
| <b>Ireland</b>                                                                                                                                 |                       |
| National Centre for Inherited Metabolic Disorders Dublin (Temple St Childrens Univeristy Hospital and Mater Misericordiae University Hospital) | 70                    |
| <b>Israel</b>                                                                                                                                  |                       |
| Sheba Medical Center Ramat Gan                                                                                                                 | 2                     |
| <b>Lithuania</b>                                                                                                                               |                       |
| Vilniaus universiteto ligoninės Santaros klinikos Santariškės                                                                                  | 1                     |
| <b>Netherlands</b>                                                                                                                             |                       |
| Erasmus Medical Center Rotterdam                                                                                                               | 31                    |
| Maastricht University Medical Center                                                                                                           | 30                    |
| Amsterdam Medical Center                                                                                                                       | 28                    |
| University Medical Center Nijmegen                                                                                                             | 14                    |
| University Medical Center Groningen                                                                                                            | 8                     |
| VU Medical Center Amsterdam                                                                                                                    | 3                     |
| University Medical Center Utrecht                                                                                                              | 1                     |
| <b>Portugal</b>                                                                                                                                |                       |
| Hospital Santa Maria Lisboa                                                                                                                    | 13                    |
| <b>Switzerland</b>                                                                                                                             |                       |
| Inselspital, University Hospital Bern                                                                                                          | 24                    |
| CHUV, University Hospital Lausanne                                                                                                             | 3                     |
| University Hospital Zurich                                                                                                                     | 4                     |
| University Children's Hospital Zurich                                                                                                          | 4                     |
| <b>Spain</b>                                                                                                                                   |                       |
| Hospital Clinic de Barcelona                                                                                                                   | 12                    |
| Complejo Hospitalario Universitario de Santiago                                                                                                | 3                     |

| <b>Country and respective center(s)</b>                                        | <b>N. of patients</b> |
|--------------------------------------------------------------------------------|-----------------------|
| <b>United Kingdom</b>                                                          |                       |
| Salford Royal NHS Foundation Trust London                                      | 41                    |
| University College London                                                      | 13                    |
| Great Ormond Street Hospital London                                            | 11                    |
| Evelina Children's Hospital St Thomas' Hospital Westminster Bridge Road London | 2                     |
| University Hospital Birmingham                                                 | 5                     |
| <b>United States</b>                                                           |                       |
| Boston Children's Hospital                                                     | 85                    |

Total number of included patients for analysis: 509
