# Supplementary material for: The natural history of classic galactosemia: lessons from the GalNet registry
Source: Orphanet J Rare Dis. 2019 Apr 27;14:86. doi: 10.1186/s13023-019-1047-z (PMC6486996; doi:10.1186/s13023-019-1047-z)
Supplement: Supplementary file 7 — Table S7. Participating countries. Total number of included patients for analysis: 509. (PDF 51 kb) [file 13023_2019_1047_MOESM7_ESM.pdf]

**Table S7**

**Table S7. Participating countries.**

| <b>Country</b> | <b>N. of patients</b> |
|----------------|-----------------------|
| Austria        | 22                    |
| Belgium        | 10                    |
| Croatia        | 7                     |
| Estonia        | 8                     |
| France         | 27                    |
| Germany        | 27                    |
| Ireland        | 70                    |
| Israel         | 2                     |
| Lithuania      | 1                     |
| Netherlands    | 115                   |
| Portugal       | 13                    |
| Switzerland    | 35                    |
| Spain          | 15                    |
| United Kingdom | 72                    |
| United States  | 85                    |

Total number of included patients for analysis: 509
